# Supplementary material for: Stronger cortisol response to acute psychosocial stress is correlated with larger decrease in temporal sensitivity
Source: PeerJ. 2016 May 26;4:e2061. doi: 10.7717/peerj.2061 (PMC4888297; doi:10.7717/peerj.2061)
Supplement: Data S1 [file peerj-04-2061-s001.xlsx]

## Sheet: Sheet1
subject	group	age	yearOFedu	body_mass_index	cort_pre	cort_post1	cort_post2	cort_post3	HR_pre	HR_during	HR_post1	HR_post2	HR_post3	NegA_pre	NegA_post1	NegA_post2	NegA_post3	PosA_pre	PosA_post1	PosA_post2	PosA_post3	plong400_pre	plong600_pre	plong800_pre	plong1000_pre	plong1200_pre	plong1400_pre	plong1600_pre	plong400_post	plong600_post	plong800_post	plong1000_post	plong1200_post	plong1400_post	plong1600_post	bisection_pre	bisection_post	WR_pre	WR_post	AUCi	bisection_change	WR_change
70	1	21	14	20.76	4.88	15.06	23.17	16.03	61.8038	75.4531	63.8375	64.638	66.5868	20	21	20	20	37	37	36	35	0	0	0	0.5	1	1	1	0	0	0.13	0.63	1	1	1	1000.05	954.184	0.0221	0.0757	8.98	-45.86	0.05
18	1	22	14	23.39	6.19	13.33	19.81	19.66	69.9556	82.5338	70.9012	70.7636	69.7311	11	38	25	21	32	26	29	28	0	0.25	0.88	1	1	1	1	0	0.38	0.38	0.75	0.5	0.88	1	673.768	913.873	0.0971	0.3043	7.44	240.11	0.21
69	1	22	14	21.07	5.65	12.5	20.9	14.28	72.8618	101.081	80.0009	78.5837	81.2092	11	11	10	10	23	27	23	27	0	0	0.5	0.63	0.88	1	1	0	0	0.25	0.38	0.63	1	1	899.54	1050.77	0.1477	0.1367	6.96	151.23	-0.01
65	1	24	15	20.83	7.66	14.47	16.79	14.12	61.5192	90.1742	69.4438	70.0908	72.5117	22	22	21	17	41	31	35	28	0	0	0	0.38	0.88	1	1	0	0	0	0.38	0.88	1	0.88	1051.95	1075.01	0.0687	0.1152	5.06	23.06	0.05
72	1	20	15	22.49	5.86	11.63	18.2	9.02	78.8615	106.96	88.671	90.0765	84.1379	13	13	13	13	35	35	35	35	0	0	0.13	0.38	1	0.88	1	0	0	0.13	0.13	1	1	1	1025.45	1051.95	0.1128	0.0687	5.05	26.49	-0.04
68	1	22	15	24.49	8.84	22.11	12.67	13.05	69.9546	83.0684	72.7935	76.6595	72.0469	10	19	15	10	25	18	18	21	0	0	0.25	0.75	0.63	1	1	0	0	0.13	0.38	0.75	0.75	0.75	974.402	1162.85	0.1499	0.1981	4.98	188.45	0.05
40	1	21	14	19	6.52	13.37	13.88	13.14	69.5361	92.6278	82.5601	82.2348	78.8079	14	13	14	14	28	24	26	21	0	0	0.38	0.88	0.88	0.88	1	0	0	0.5	0.75	0.88	1	1	898.938	874.774	0.1643	0.1421	4.66	-24.16	-0.02
71	1	18	14	25.65	5.63	12.26	12.26	11.1	89.558	114.653	102.312	96.88	93.6185	12	16	11	13	25	23	19	20	0	0	0	0.25	0.38	0.88	1	0	0	0	0.75	0.88	1	1	1200.6	972.338	0.0981	0.0779	4.23	-228.26	-0.02
41	1	22	15	23.51	6.81	13.39	14.28	11.05	75.8316	84.5848	73.8337	71.8806	72.296	13	14	13	11	27	23	21	16	0	0	0.25	0.63	0.75	1	1	0	0	0	0.5	0.88	1	1	974.605	1020.88	0.1348	0.0742	4.22	46.27	-0.06
35	1	21	15	17.76	9.69	14.89	18.36	13.81	72.2454	73.9094	68.3305	70.3578	67.7194	14	31	20	20	34	30	38	38	0.13	0	0.13	0.5	0.63	0.88	1	0	0	0.13	0.75	0.63	0.88	0.88	1052.31	1052.31	0.1884	0.1884	4.15	0	0
51	1	20	15	20.24	7.29	13.16	12.59	12.47	75.245	110.371	81.2084	81.6596	79.9735	10	12	10	10	16	18	15	16	0	0	0.5	0.88	1	1	1	0.13	0	0.13	0.13	0.88	1	1	826.521	1050.77	0.0923	0.1367	3.66	224.25	0.04
42	1	22	15	23.46	7.99	13.28	13.45	12.81	83.7192	111.169	89.0481	82.9525	85.4305	11	14	14	10	32	30	28	33	0	0	0	0.63	0.88	0.88	0.88	0	0.13	0	0.38	0.75	1	1	1050.06	1050.14	0.1501	0.1225	3.49	0.08	-0.03
19	1	21	14	22.86	6.52	11.18	13.46	9.53	73.7134	89.425	74.4472	76.4633	74.5753	10	13	10	10	37	33	35	36	0	0.25	0.13	0.75	1	0.88	1	0.13	0.75	1	0.75	1	1	1	897.923	546.777	0.1802	0.3159	3.4	-351.15	0.14
62	1	20	15	20.37	11.86	13.57	23.63	10.23	68.045	92.9173	75.976	75.5909	73.9004	20	21	20	20	34	34	31	32	0	0	0.5	0.75	1	1	1	0	0	0.5	0.88	1	1	1	851.741	826.521	0.1112	0.0923	3.1	-25.22	-0.02
56	1	21	15	22.53	4.91	8.75	8	12.41	63.6037	78.1886	66.3876	67.2641	67.6397	17	20	16	17	25	23	24	25	0	0	0.13	0.63	1	1	1	0	0	0.13	0.38	0.63	0.88	0.88	954.184	1129.32	0.0757	0.1616	2.98	175.13	0.09
33	1	22	15	21.8	6.86	9.68	11.07	14.19	66.9335	90.1056	70.3894	69.3951	68.4534	23	28	25	22	29	29	26	26	0	0.13	0	0.63	0.75	0.75	0.88	0	0	0.25	0.38	0.5	0.75	0.75	1079.42	1197.17	0.2052	0.2217	2.98	117.76	0.02
57	1	22	16	20.52	10.26	7.67	24.1	11.05	67.4893	86.5793	68.9206	69.1769	76.2892	17	15	13	11	37	38	33	31	0	0	0.88	0.63	1	1	1	0	0.38	0.63	1	1	1	1	798.971	697.853	0.1474	0.1444	2.94	-101.12	0
63	1	23	15	23.15	6.63	10	10.71	11.83	60.6589	84.4708	65.0625	62.6113	61.4573	16	20	17	16	21	18	20	19	0.13	0.25	0.63	0.75	1	1	1	0	0.13	0.13	0.88	1	1	1	743.134	877.782	0.2206	0.1009	2.73	134.65	-0.12
14	1	22	14	24.54	8.13	11.61	11.75	13.41	65.0195	89.3163	68.21	65.0513	62.0357	19	17	15	16	37	35	32	33	0	0.13	0.25	0.38	0.5	1	1	0	0	0.13	0.25	0.5	0.88	1	1051.94	1150.99	0.1758	0.1258	2.65	99.05	-0.05
52	1	23	15	20.62	5.86	8.71	10.84	9.92	59.3683	75.2369	59.73	61.2007	63.0865	19	23	22	16	37	36	32	29	0	0	0.63	1	1	1	1	0	0	0.63	1	1	1	1	790.022	790.022	0.0252	0.0252	2.63	0	0
55	1	22	15	20.06	8.96	11.63	14.45	12.02	77.5866	96.8948	74.1829	74.055	72.2542	18	22	16	16	40	38	38	40	0	0	0.13	0.63	0.88	1	1	0.13	0	0.75	1	0.88	1	1	978.036	747.71	0.1003	0.1762	2.55	-230.33	0.08
53	1	24	15	24.22	8.1	10.96	11.73	13.39	80.1068	106.889	89.0086	85.3682	85.8865	20	19	14	17	35	34	33	35	0	0.13	0	0.25	0.88	1	1	0	0.13	0.25	0.5	1	1	1	1050.45	924.498	0.1072	0.134	2.5	-125.95	0.03
15	2	21	14	24.22	15.42	22.36	19.66	13.63	88.4696	99.7009	89.8188	88.9119	86.6521	14	12	12	13	30	29	26	25	0	0.13	0.5	0.88	1	1	1	0	0.13	0.13	0.63	0.75	0.75	0.75	803.064	1083.75	0.1244	0.2566	2.5	280.68	0.13
23	1	20	14	20.02	7.89	11.93	11.98	8.78	60.4402	75.8337	63.114	63.4096	64.618	12	10	10	10	30	30	21	16	0	0.5	0.88	0.75	1	0.88	1	0.13	0.25	0.5	1	1	1	1	678.577	722.141	0.3032	0.1761	2.18	43.56	-0.13
47	1	20	15	24.69	5.58	7.81	9.13	9.96	60.526	70.2897	62.422	61.8129	60.5978	10	10	10	10	31	24	24	24	0	0	0.5	0.88	1	0.88	1	0	0	0.75	0.88	1	1	1	848.587	776.903	0.1525	0.0982	2.18	-71.68	-0.05
29	2	20	14	23.8	11.14	17.51	14.34	9.77	58.0864	64.5075	59.665	61.3679	58.3203	20	17	20	18	24	26	22	18	0	0	0.25	0.63	1	1	1	0	0.13	0	0.75	0.88	1	1	921.64	950.318	0.0954	0.1184	2.16	28.68	0.02
38	1	22	14	21.8	10.98	13.76	15.77	12.44	78.631	100.719	81.2589	83.922	81.6232	25	20	24	23	40	39	39	37	0	0	0.25	0.38	0.63	0.75	0.88	0	0	0	0.5	0.63	0.63	0.88	1132.81	1184.97	0.1975	0.1739	2.14	52.16	-0.02
59	2	20	15	20.83	6.58	11.48	9.79	7.16	61.7919	70.539	67.9923	68.4738	68.1929	16	12	11	13	29	36	32	33	0	0	0.63	0.75	1	1	1	0	0	0.25	1	1	1	1	824.304	819.739	0.119	0.0237	2.12	-4.57	-0.1
67	1	22	15	23.15	11.47	14.33	15	14.43	75.7357	95.0169	78.268	77.2801	75.4034	13	20	12	15	20	13	17	20	0.13	0	0	0.5	0.75	1	1	0.13	0	0.38	0.75	0.88	1	1	974.402	872.725	0.1499	0.1768	2.09	-101.68	0.03
64	1	23	15	18.94	9.36	12.1	13.87	10.87	62.0659	80.4816	64.8947	66.6101	68.6354	11	18	10	10	27	27	31	37	0	0.13	0.75	1	1	1	1	0	0.13	0.38	0.75	0.88	1	1	728.036	874.224	0.0898	0.1599	2.06	146.19	0.07
36	1	22	14	20.29	5.58	6.95	9.04	7.1	75.7816	92.3298	79.1543	80.2797	75.5231	12	10	13	11	38	36	30	26	0	0	0.38	0.88	1	1	1	0	0	0.13	0.75	1	1	1	851.02	924.101	0.0849	0.0703	1.46	73.08	-0.01
27	2	21	14	20.76	7.79	9.24	10.49	9.51	75.8666	84.544	84.0561	84.4842	83.4671	11	10	10	10	24	20	20	17	0	0.25	0.25	0.63	1	1	1	0	0.38	0.63	0.88	0.88	1	1	874.224	743.134	0.1599	0.2206	1.32	-131.09	0.06
73	1	19	14	22.15	5.92	6.57	6.88	9.91	66.1418	76.6683	60.9402	61.5755	64.0981	10	11	10	10	24	19	19	20	0	0.13	0.63	0.88	1	1	1	0	0.13	0.75	0.88	1	1	1	771.857	747.345	0.1271	0.1267	1.07	-24.51	0
39	1	22	16	21.01	6.94	9.06	7.46	8.4	60.8642	79.4293	69.1566	70.4335	69.998	14	17	17	15	33	32	31	30	0	0.13	0.25	0.5	0.75	1	1	0	0	0.25	0.75	1	1	1	974.563	900.101	0.1643	0.0878	0.9	-74.46	-0.08
48	1	20	15	23.15	8.28	7.84	11.14	9.3	60.678	69.5686	61.0971	61.88	61.0312	11	15	10	11	27	23	22	17	0.13	0	0	0	0.25	0.5	0.88	0	0	0	0.25	0.38	0.63	0.75	1382.79	1322.02	0.1528	0.1556	0.78	-60.77	0
16	2	20	14	21.68	6.27	6.96	6.76	8.02	50.8415	57.1974	54.8651	54.5317	56.8085	13	13	13	12	30	27	26	25	0	0	0.5	1	0.88	1	1	0	0	0.75	1	1	1	1	824.304	780.723	0.119	0.0248	0.59	-43.58	-0.09
81	2	20	14	21.47	5.06	5.3	7.03	4.18	72.3681	76.9128	76.6089	73.7748	75.0634	16	23	20	21	36	26	35	28	0	0	0	0.38	0.88	1	1	0	0	0.13	0.38	0.75	1	1	1051.95	1050.45	0.0687	0.1072	0.41	-1.5	0.04
54	1	21	15	21.63	7.46	8.65	8.43	6.27	61.6523	73.3886	66.4672	64.1925	64.1714	15	15	13	12	33	29	28	25	0	0	0.25	0.38	0.38	1	0.63	0	0	0	0.13	0.38	0.75	0.75	1197.17	1311.18	0.2217	0.1313	0.34	114	-0.09
34	2	21	14	19.57	6.32	6.79	5.84	6.25	88.6896	82.4701	84.58	83.7971	83.4994	18	10	10	12	27	29	20	23	0	0	0.38	0.75	0.88	0.88	1	0	0	0.38	0.75	1	1	1	924.392	877.782	0.1662	0.1009	-0.01	-46.61	-0.07
22	2	22	15	22.72	9.62	9.11	9.19	10.5	60.8363	65.4293	62.0757	61.4394	58.6626	14	11	11	17	40	40	42	41	0	0.25	0.25	0.38	1	0.75	1	0.13	0	0.25	0.63	0.75	0.88	1	973.619	974.161	0.2195	0.2058	-0.09	0.54	-0.01
13	1	20	15	22.09	10.55	10.28	10.75	9.91	66.9594	82.6596	71.8371	73.2936	71.3713	15	18	15	13	26	23	22	17	0	0	0.25	0.5	1	1	1	0	0	0.13	0.5	0.88	1	1	954.267	1000.37	0.0992	0.0989	-0.12	46.1	0
20	2	24	15	19.88	9.2	9.48	9.42	7.38	64.7167	78.196	62.4117	63.9908	63.5391	28	22	20	20	37	35	32	32	0	0.25	0.63	0.88	1	0.88	1	0	0.13	0	0.5	1	1	1	769.639	978.036	0.215	0.1003	-0.18	208.4	-0.11
24	2	21	14	21.06	6.44	5.89	6.61	5.89	64.1655	67.5765	64.2471	62.088	61.2961	21	20	13	10	30	28	32	31	0.13	0.63	1	1	1	1	1	0	0.5	0.75	1	1	1	1	549.831	646.807	0.135	0.149	-0.19	96.98	0.01
37	2	20	15	20.11	9.68	10.02	9.37	7.93	84.4747	89.4882	82.0244	85.1006	86.2224	10	14	10	10	26	27	27	31	0	0	0.63	1	0.75	1	1	0	0.25	0.63	0.88	1	1	1	823.712	748.566	0.1613	0.1526	-0.28	-75.15	-0.01
82	2	21	14	18.59	2.62	0.959	2.87	1.35	64.5733	69.331	66.9616	69.778	64.4303	17	19	16	18	39	44	39	33	0	0.13	0.38	0.63	1	1	1	0	0.25	0.25	0.88	1	0.88	1	874.774	847.126	0.1421	0.1882	-0.56	-27.65	0.05
84	2	22	15	19.15	4.15	2.2	4.8	2.04	70.6491	76.7812	73.7899	72.0558	72.281	15	18	15	16	36	36	32	29	0	0	0.13	0.38	0.88	1	1	0	0	0.13	0.25	1	1	1	1027.98	1020.88	0.0954	0.0742	-0.68	-7.11	-0.02
31	2	19	14	23.39	8.77	8.11	7.59	7.18	56.8036	60.1671	56.5107	56.0537	57.8886	14	18	13	13	31	27	28	29	0	0	0	0.88	0.75	1	1	0	0	0.5	0.75	0.88	1	1	978.036	874.774	0.1003	0.1421	-0.73	-103.26	0.04
200	2	23	15	24.31	8.18	8.04	6.41	5.4	54.9194	65.1327	62.0785	61.0744	62.3515	14	15	11	15	30	32	29	28	0	0.38	0.13	0.63	1	1	1	0	0	0.25	0.5	1	1	1	1126.22	1054.28	0.137	0.0898	-0.94	-71.94	-0.05
85	2	21	13	17.86	7.39	6.17	6.85	3.56	69.6465	79.1141	73.2247	73.0058	70.893	12	13	11	14	27	32	27	28	0	0.13	0.38	1	0.88	1	1	0	0	0.63	0.75	1	1	1	824.237	824.304	0.1412	0.119	-1.08	0.07	-0.02
50	2	24	17	21.85	6.67	5.43	5.12	4.37	74.9361	77.8356	77.0875	74.3564	72.48	12	13	11	11	38	39	39	34	0	0	0.38	1	1	1	1	0	0	0.13	0.63	1	1	1	809.534	954.184	0.0247	0.0757	-1.08	144.65	0.05
61	2	21	15	19.79	7.62	5.48	6.03	5.14	79.0481	78.8529	77.7231	79.6701	76.8511	14	10	11	12	32	31	28	27	0	0.13	0	0.38	1	0.88	1	0	0	0	0.5	0.63	1	1	1024.84	1079.94	0.1282	0.0997	-1.35	55.1	-0.03
201	2	21	15	21.89	6.29	4.87	3.96	3.6	72.6482	80.9279	72.8797	72.6491	70.8807	18	13	11	10	29	20	22	18	0.13	0.38	0.5	0.63	0.88	1	1	0.13	0.13	0.13	0.38	0.88	1	1	1214.99	1026.03	0.1842	0.1694	-1.39	-188.96	-0.01
58	2	22	16	19.25	12.17	7.91	7.82	15.42	69.9351	80.1582	70.8924	72.5619	68.9513	17	13	15	12	22	26	17	13	0	0	0.25	0.63	1	1	1	0	0.13	0.38	0.63	0.88	1	1	921.64	898.938	0.0954	0.1643	-1.61	-22.7	0.07
83	2	21	14	25.96	7.22	4.13	5.74	3.06	65.7537	66.6717	66.7647	64.8905	64.8311	13	13	10	13	18	22	19	14	0	0.25	0.63	0.88	1	1	1	0	0.13	0.5	0.88	1	1	1	748.566	803.064	0.1526	0.1244	-1.84	54.5	-0.03
43	2	22	15	23.03	14.62	14.97	9.98	8.84	79.7877	83.6404	80.303	79.5855	78.4004	22	18	16	12	32	33	30	25	0	0	0.5	0.88	1	1	1	0.13	0	0.88	1	1	1	1	826.521	701.043	0.0923	0.1136	-2.04	-125.48	0.02
25	2	21	14	21.05	10.5	6.71	7.07	6.4	69.4787	75.7219	71.2353	71.4625	67.3815	15	15	11	13	26	18	20	16	0	0	0.13	0.25	0.75	0.75	1	0	0.13	0.25	0.5	0.88	0.75	1	1126.22	1000.27	0.137	0.2012	-2.49	-125.95	0.06
60	2	21	15	23.36	11.22	7.47	6.12	5.66	78.1196	78.3304	77.3326	79.0855	78.097	15	12	13	12	20	19	18	17	0	0.13	0.25	0.75	0.75	1	1	0	0	0.38	0.5	0.88	1	1	924.392	949.707	0.1662	0.1355	-3.14	25.32	-0.03
